# Supplementary material
Source: PubMed Central journal article supplement (PMC4790610)
Supplement: bils004673.ww1_default.pdf [file bils004673.ww1_default.pdf]

**Supplementary table.** Previous studies estimating the association between benzodiazepine use and risk of dementia.

| Study                                                                             | Population             | Study duration | Confounders                                                                                                                                                                                                                                                                                               | Odds ratio of the association between benzodiazepine use and dementia                                                                                                                                                                                                                                                                                                                                                                                                                                                                                                                                                                                                                                                                                                                                                                                                                                                                                                                                                                                                                                                                                                                                                                                                                                                                                                                                                                                                                                                                                                                                                                                                                                                                                                                             |
|-----------------------------------------------------------------------------------|------------------------|----------------|-----------------------------------------------------------------------------------------------------------------------------------------------------------------------------------------------------------------------------------------------------------------------------------------------------------|---------------------------------------------------------------------------------------------------------------------------------------------------------------------------------------------------------------------------------------------------------------------------------------------------------------------------------------------------------------------------------------------------------------------------------------------------------------------------------------------------------------------------------------------------------------------------------------------------------------------------------------------------------------------------------------------------------------------------------------------------------------------------------------------------------------------------------------------------------------------------------------------------------------------------------------------------------------------------------------------------------------------------------------------------------------------------------------------------------------------------------------------------------------------------------------------------------------------------------------------------------------------------------------------------------------------------------------------------------------------------------------------------------------------------------------------------------------------------------------------------------------------------------------------------------------------------------------------------------------------------------------------------------------------------------------------------------------------------------------------------------------------------------------------------|
| Caerphilly Prospective Study, South Wales (Gallacher <i>et al.</i> 2011)          | 1 134 men<br>≥45 years | 22             | Age, social class, smoking, alcohol intake, education, body mass index, angina, anxiety, cognitive function test (National Adult Reading Text, Mini-Mental State Examination, AH4, Choice Reaction Time, Cambridge Cognitive Examination), ischaemic heart disease, distress, anxiety, daytime sleepiness | <p><u>Ever use versus never use:</u> adjusted odds ratio 2.94*</p> <p><u>Cumulative duration:</u></p> <ul style="list-style-type: none"> <li>. ≤4 years <i>versus</i> never use: adjusted odds ratio 4.38</li> <li>. &gt;4 years <i>versus</i> never use: adjusted odds ratio 2.31</li> </ul> <p><u>History of use:</u></p> <ul style="list-style-type: none"> <li>. former use <i>versus</i> never use: adjusted odds ratio 2.64</li> <li>. recent use <i>versus</i> never use: adjusted odds ratio 2.44</li> <li>. current use <i>versus</i> never use: adjusted odds ratio 2.64</li> </ul>                                                                                                                                                                                                                                                                                                                                                                                                                                                                                                                                                                                                                                                                                                                                                                                                                                                                                                                                                                                                                                                                                                                                                                                                     |
| National Health Insurance Research database study, Taiwan (Wu <i>et al.</i> 2010) | 25 140<br>≥45 years    | 8              | Age, gender, anxiety disorders, health care system utilization, mood disorders, alcohol related disorders, psychotic related disorders, substance use disorders, sleep disorders, diabetes, hypertension and its complication, cerebrovascular disorders, parkinsonism, epileptic disorders               | <p><u>History of use in all users:</u></p> <ul style="list-style-type: none"> <li>. current use (no discontinuation) <i>versus</i> never use: adjusted odds ratio 2.71*</li> <li>. former use (&lt;1 year discontinuation) <i>versus</i> never use: adjusted odds ratio 1.68*</li> <li>. former use (1 to &lt;2 years discontinuation) <i>versus</i> never use: adjusted odds ratio 1.23*</li> <li>. former use (2 to &lt;3 years discontinuation) <i>versus</i> never use: adjusted odds ratio 1.22*</li> <li>. former use (≥3 years discontinuation) <i>versus</i> never use: adjusted odds ratio 1.08</li> </ul> <p><u>History of use in light users (1 to &lt;90 Defined Daily Dose):</u></p> <ul style="list-style-type: none"> <li>. current use (no discontinuation) <i>versus</i> never use: adjusted odds ratio 4.66*</li> <li>. former use (&lt;1 year discontinuation) <i>versus</i> never use: adjusted odds ratio 1.63*</li> <li>. former use (1 to &lt;2 years discontinuation) <i>versus</i> never use: adjusted odds ratio 1.06</li> <li>. former use (2 to &lt;3 years discontinuation) <i>versus</i> never use: adjusted odds ratio 1.13</li> <li>. former use (≥3 years discontinuation) <i>versus</i> never use: adjusted odds ratio 1.03</li> </ul> <p><u>History of use in middle users (90 to &lt;360 Defined Daily Dose):</u></p> <ul style="list-style-type: none"> <li>. current use (no discontinuation) <i>versus</i> never use: adjusted odds ratio 3.06*</li> <li>. former use (&lt;1 year discontinuation) <i>versus</i> never use: adjusted odds ratio 1.54*</li> <li>. former use (1 to 2 years discontinuation) <i>versus</i> never use: adjusted odds ratio 1.34*</li> <li>. former use (2 to &lt;3 years discontinuation) <i>versus</i> never use:</li> </ul> |

|                                                                                   |                              |   |                                                                                                                                                                                                     |                                                                                                                                                                                                                                                                                                                                                                                                                                                                                                                                                                                                                                                                                                                                                                                                                                                          |
|-----------------------------------------------------------------------------------|------------------------------|---|-----------------------------------------------------------------------------------------------------------------------------------------------------------------------------------------------------|----------------------------------------------------------------------------------------------------------------------------------------------------------------------------------------------------------------------------------------------------------------------------------------------------------------------------------------------------------------------------------------------------------------------------------------------------------------------------------------------------------------------------------------------------------------------------------------------------------------------------------------------------------------------------------------------------------------------------------------------------------------------------------------------------------------------------------------------------------|
|                                                                                   |                              |   |                                                                                                                                                                                                     | <p>adjusted odds ratio 1.26</p> <ul style="list-style-type: none"> <li>former use (<math>\geq 3</math> years discontinuation) <i>versus</i> never use: adjusted odds ratio 1.15</li> </ul> <p><u>History of use in heavy users (<math>\geq 360</math> Defined Daily Dose):</u></p> <ul style="list-style-type: none"> <li>current use (no discontinuation) <i>versus</i> never use: adjusted odds ratio 2.12*</li> <li>former use (&lt;1 year discontinuation) <i>versus</i> never use: adjusted odds ratio 1.87*</li> <li>former use (1 to 2 years discontinuation) <i>versus</i> never use: adjusted odds ratio 1.73*</li> <li>former use (2-3 years discontinuation) <i>versus</i> never use: adjusted odds ratio 1.67*</li> <li>former use (<math>\geq 3</math> years discontinuation) <i>versus</i> never use: adjusted odds ratio 1.65*</li> </ul> |
| National Health Insurance Research database study, Taiwan (Wu <i>et al.</i> 2009) | 5 405<br>$\geq 45$ years     | 8 | Age, gender, anxiety disorders, mood disorders, alcohol-related disorders, diabetes, dyslipidemia, hypertension and its complication, (including depression and anxiety), cerebrovascular disorders | <p><u>Cumulative dose:</u></p> <ul style="list-style-type: none"> <li>90 to 180 Defined Daily Dose <i>versus</i> &lt;90 Defined Daily Dose: adjusted odds ratio 1.07</li> <li>&gt;180 Defined Daily Dose <i>versus</i> &lt;90 Defined Daily Dose: adjusted odds ratio 1.32*</li> </ul> <p><u>Cumulative days:</u></p> <ul style="list-style-type: none"> <li>90 to 180 days <i>versus</i> &lt;90 days: adjusted odds ratio 1.25</li> <li>&gt;180 days <i>versus</i> &lt;90 days: adjusted odds ratio 1.43*</li> </ul> <p><u>Chronic use:</u></p> <ul style="list-style-type: none"> <li>&gt;6 months <i>versus</i> <math>\leq 6</math> months: adjusted odds ratio 1.24*</li> </ul>                                                                                                                                                                      |
| Canadian study of Health and Aging, Quebec (Lagnaoui <i>et al.</i> 2009)          | 510 women<br>$\geq 65$ years | 5 | Age, educational level, activities of daily living scale, institutionalisation, number of drugs used, exposure to non-steroidal anti-inflammatory drugs, exposure to estrogens                      | <p><u>History of use:</u></p> <ul style="list-style-type: none"> <li>current use <i>versus</i> never use: adjusted odds ratio 1.0</li> <li>former use <i>versus</i> never use: adjusted odds ratio 1.5</li> </ul>                                                                                                                                                                                                                                                                                                                                                                                                                                                                                                                                                                                                                                        |
| PAQUID study, France (Lagnaoui <i>et al.</i> 2002)                                | 3 654<br>$\geq 65$ years     | 8 | Age, gender, educational level, living alone, depressive symptoms, history of psychiatric diseases, alcohol use                                                                                     | <p><u>History of use:</u></p> <ul style="list-style-type: none"> <li>ever use <i>versus</i> never use: adjusted odds ratio 1.7*</li> <li>current use <i>versus</i> never use: adjusted odds ratio 1.0</li> <li>former use <i>versus</i> never use: adjusted odds ratio 2.3*</li> </ul>                                                                                                                                                                                                                                                                                                                                                                                                                                                                                                                                                                   |
| Kungsholmen study, Sweden (Fastbom <i>et al.</i> 1998)                            | 242<br>$\geq 75$ years       | 3 | Age, gender, educational level, exposure to non-steroidal anti-inflammatory drugs, exposure to estrogens                                                                                            | <p><u>Chronic use:</u></p> <ul style="list-style-type: none"> <li>3-year use <i>versus</i> &lt;3 year-use: estimated unadjusted odds ratio 0.34</li> </ul>                                                                                                                                                                                                                                                                                                                                                                                                                                                                                                                                                                                                                                                                                               |

\* Statistically significant
